# Supplementary material
Source: MDPI journal article supplement (https://www.mdpi.com/2075-163X/12/9/1152)
Supplement: s1 [file s1]

**Supplementary Table S1.** EPMA data for clinopyroxenes from Jinling diorites (JL-cpx1-4), skarn and ore (JL-cpx5-54, samples JL-cpx5-35 are colorless and samples JL-cpx36-54 are light-green).

| Sample No.                     | JL-cpx1  | JL-cpx2  | JL-cpx3  | JL-cpx4  | JL-cpx5  | JL-cpx6  | JL-cpx7  | JL-cpx8  | JL-cpx9  | JL-cpx10 | JL-cpx11 |
|--------------------------------|----------|----------|----------|----------|----------|----------|----------|----------|----------|----------|----------|
| SiO <sub>2</sub>               | 52.71    | 53.53    | 54.35    | 53.43    | 53.10    | 52.77    | 52.17    | 52.15    | 52.13    | 52.49    | 52.07    |
| TiO <sub>2</sub>               | 0.32     | 0.08     | 0.07     | 0.15     | 0.04     | 0.01     | 0.05     | 0.12     | 0.04     | 0.00     | 0.07     |
| Al <sub>2</sub> O <sub>3</sub> | 1.15     | 0.52     | 0.39     | 0.58     | 1.80     | 1.70     | 1.92     | 2.73     | 2.28     | 1.66     | 1.78     |
| Cr <sub>2</sub> O <sub>3</sub> | 0.04     | 0.02     | 0.02     | 0.00     | 0.05     | 0.02     | 0.00     | 0.05     | 0.01     | 0.01     | 0.00     |
| FeO                            | 6.96     | 6.53     | 5.81     | 6.86     | 3.86     | 3.75     | 3.99     | 4.19     | 3.89     | 4.03     | 3.69     |
| MnO                            | 0.21     | 0.42     | 0.35     | 0.33     | 0.12     | 0.21     | 0.13     | 0.10     | 0.15     | 0.18     | 0.12     |
| MgO                            | 15.76    | 15.00    | 15.57    | 15.47    | 16.10    | 15.74    | 15.63    | 15.49    | 15.71    | 15.69    | 15.78    |
| CaO                            | 21.51    | 22.21    | 22.52    | 21.36    | 25.41    | 25.04    | 25.03    | 24.68    | 25.05    | 25.18    | 24.65    |
| Na <sub>2</sub> O              | 0.38     | 0.44     | 0.56     | 0.31     | 0.11     | 0.12     | 0.11     | 0.12     | 0.03     | 0.10     | 0.06     |
| K <sub>2</sub> O               | 0.00     | 0.01     | 0.00     | 0.00     | 0.02     | 0.03     | 0.04     | 0.00     | 0.03     | 0.02     | 0.00     |
| Total                          | 99.04    | 98.76    | 99.64    | 98.49    | 100.61   | 99.39    | 99.07    | 99.63    | 99.32    | 99.36    | 98.22    |
| Si                             | 1.97     | 2.00     | 2.01     | 2.00     | 1.94     | 1.95     | 1.94     | 1.92     | 1.93     | 1.94     | 1.95     |
| Ti                             | 0.01     | 0.00     | 0.00     | 0.00     | 0.00     | 0.00     | 0.00     | 0.00     | 0.00     | 0.00     | 0.00     |
| Al <sup>IV</sup>               | 0.03     | 0.00     | 0.00     | 0.00     | 0.06     | 0.05     | 0.06     | 0.08     | 0.07     | 0.06     | 0.05     |
| Al <sup>VI</sup>               | 0.02     | 0.02     | 0.02     | 0.02     | 0.02     | 0.02     | 0.02     | 0.04     | 0.03     | 0.02     | 0.02     |
| Cr                             | 0.00     | 0.00     | 0.00     | 0.00     | 0.00     | 0.00     | 0.00     | 0.00     | 0.00     | 0.00     | 0.00     |
| Fe <sup>3+</sup>               | 0.04     | 0.00     | 0.01     | 0.00     | 0.07     | 0.05     | 0.07     | 0.05     | 0.06     | 0.07     | 0.05     |
| Fe <sup>2+</sup>               | 0.18     | 0.20     | 0.17     | 0.21     | 0.05     | 0.07     | 0.05     | 0.08     | 0.06     | 0.06     | 0.07     |
| Mn                             | 0.01     | 0.01     | 0.01     | 0.01     | 0.00     | 0.01     | 0.00     | 0.00     | 0.00     | 0.01     | 0.00     |
| Mg                             | 0.88     | 0.84     | 0.86     | 0.86     | 0.88     | 0.87     | 0.87     | 0.85     | 0.87     | 0.87     | 0.88     |
| Ca                             | 0.86     | 0.89     | 0.89     | 0.86     | 0.99     | 0.99     | 1.00     | 0.98     | 0.99     | 1.00     | 0.99     |
| Na                             | 0.03     | 0.03     | 0.04     | 0.02     | 0.01     | 0.01     | 0.01     | 0.01     | 0.00     | 0.01     | 0.00     |
| K                              | 0.00     | 0.00     | 0.00     | 0.00     | 0.00     | 0.00     | 0.00     | 0.00     | 0.00     | 0.00     | 0.00     |
| Total                          | 4.03     | 3.99     | 4.01     | 3.98     | 4.02     | 4.02     | 4.02     | 4.01     | 4.01     | 4.04     | 4.01     |
| Wo                             | 43.27    | 45.04    | 45.03    | 43.53    | 49.72    | 49.85    | 49.88    | 49.57    | 50.00    | 49.89    | 49.62    |
| En                             | 44.12    | 42.33    | 43.32    | 43.87    | 43.84    | 43.60    | 43.35    | 43.28    | 43.64    | 43.26    | 44.21    |
| Fs                             | 11.22    | 11.00    | 9.62     | 11.47    | 6.05     | 6.13     | 6.38     | 6.71     | 6.26     | 6.48     | 5.96     |
| Ac                             | 1.38     | 1.63     | 2.02     | 1.14     | 0.39     | 0.41     | 0.39     | 0.45     | 0.11     | 0.36     | 0.21     |
| Di                             | 83.00    | 80.00    | 83.00    | 79.00    | 94.00    | 92.00    | 94.00    | 91.00    | 93.00    | 93.00    | 92.00    |
| Hd                             | 17.00    | 19.00    | 16.00    | 20.00    | 5.00     | 7.00     | 6.00     | 8.00     | 6.00     | 6.00     | 7.00     |
| Jo                             | 1.00     | 1.00     | 1.00     | 1.00     | 0.00     | 1.00     | 0.00     | 0.00     | 0.00     | 1.00     | 0.00     |
| Sample No.                     | JL-cpx12 | JL-cpx13 | JL-cpx14 | JL-cpx15 | JL-cpx16 | JL-cpx17 | JL-cpx18 | JL-cpx19 | JL-cpx20 | JL-cpx21 | JL-cpx22 |
| SiO <sub>2</sub>               | 52.51    | 49.51    | 56.56    | 56.01    | 56.47    | 54.49    | 53.72    | 55.05    | 55.32    | 54.58    | 54.93    |
| TiO <sub>2</sub>               | 0.02     | 0.13     | 0.00     | 0.00     | 0.08     | 0.00     | 0.08     | 0.03     | 0.00     | 0.01     | 0.00     |
| Al <sub>2</sub> O <sub>3</sub> | 1.72     | 5.33     | 0.45     | 0.80     | 0.69     | 0.79     | 1.98     | 0.84     | 0.16     | 0.53     | 0.49     |

**Table S1. (continued)**

| Sample No.                     | JL-cpx12 | JL-cpx13 | JL-cpx14 | JL-cpx15 | JL-cpx16 | JL-cpx17 | JL-cpx18 | JL-cpx19 | JL-cpx20 | JL-cpx21 | JL-cpx22 |
|--------------------------------|----------|----------|----------|----------|----------|----------|----------|----------|----------|----------|----------|
| Cr <sub>2</sub> O <sub>3</sub> | 0.04     | 0.02     | 0.06     | 0.00     | 0.00     | 0.00     | 0.03     | 0.00     | 0.04     | 0.02     | 0.00     |
| FeO                            | 3.88     | 4.49     | 1.61     | 1.29     | 0.38     | 0.44     | 0.36     | 0.37     | 0.28     | 0.69     | 0.26     |
| MnO                            | 0.26     | 0.03     | 0.01     | 0.00     | 0.02     | 0.00     | 0.03     | 0.03     | 0.01     | 0.07     | 0.00     |
| MgO                            | 15.78    | 14.09    | 17.69    | 16.74    | 17.88    | 17.95    | 17.53    | 18.12    | 18.18    | 18.24    | 18.54    |
| CaO                            | 24.93    | 25.13    | 26.22    | 26.04    | 25.89    | 25.37    | 25.62    | 24.91    | 25.70    | 25.42    | 25.87    |
| Na <sub>2</sub> O              | 0.06     | 0.11     | 0.04     | 0.13     | 0.00     | 0.06     | 0.07     | 0.04     | 0.09     | 0.04     | 0.14     |
| K <sub>2</sub> O               | 0.01     | 0.02     | 0.00     | 0.00     | 0.00     | 0.04     | 0.01     | 0.02     | 0.03     | 0.00     | 0.00     |
| Total                          | 99.21    | 98.86    | 102.64   | 101.01   | 101.41   | 99.14    | 99.43    | 99.41    | 99.81    | 99.60    | 100.23   |
| Si                             | 1.95     | 1.85     | 2.00     | 2.01     | 2.00     | 1.98     | 1.95     | 1.99     | 2.00     | 1.98     | 1.98     |
| Ti                             | 0.00     | 0.00     | 0.00     | 0.00     | 0.00     | 0.00     | 0.00     | 0.00     | 0.00     | 0.00     | 0.00     |
| Al <sup>IV</sup>               | 0.05     | 0.15     | 0.00     | 0.00     | 0.00     | 0.02     | 0.05     | 0.01     | 0.00     | 0.02     | 0.02     |
| Al <sup>VI</sup>               | 0.02     | 0.09     | 0.02     | 0.04     | 0.03     | 0.02     | 0.04     | 0.03     | 0.01     | 0.00     | 0.00     |
| Cr                             | 0.00     | 0.00     | 0.00     | 0.00     | 0.00     | 0.00     | 0.00     | 0.00     | 0.00     | 0.00     | 0.00     |
| Fe <sup>3+</sup>               | 0.05     | 0.10     | 0.00     | 0.00     | 0.00     | 0.01     | 0.02     | 0.00     | 0.00     | 0.02     | 0.04     |
| Fe <sup>2+</sup>               | 0.07     | 0.04     | 0.05     | 0.04     | 0.01     | 0.01     | 0.00     | 0.01     | 0.01     | 0.00     | 0.00     |
| Mn                             | 0.01     | 0.00     | 0.00     | 0.00     | 0.00     | 0.00     | 0.00     | 0.00     | 0.00     | 0.00     | 0.00     |
| Mg                             | 0.87     | 0.79     | 0.93     | 0.89     | 0.95     | 0.97     | 0.95     | 0.98     | 0.98     | 0.99     | 1.00     |
| Ca                             | 0.99     | 1.01     | 0.99     | 1.00     | 0.98     | 0.99     | 1.00     | 0.97     | 1.00     | 0.99     | 1.00     |
| Na                             | 0.00     | 0.01     | 0.00     | 0.01     | 0.01     | 0.00     | 0.01     | 0.00     | 0.01     | 0.00     | 0.01     |
| K                              | 0.00     | 0.00     | 0.00     | 0.00     | 0.00     | 0.00     | 0.00     | 0.00     | 0.00     | 0.00     | 0.00     |
| Total                          | 4.01     | 4.04     | 3.99     | 3.99     | 3.98     | 4.00     | 4.02     | 3.99     | 4.01     | 4.00     | 4.05     |
| Wo                             | 49.63    | 51.88    | 50.26    | 51.49    | 50.55    | 49.93    | 50.79    | 49.33    | 50.02    | 49.40    | 49.62    |
| En                             | 43.71    | 40.48    | 47.18    | 46.06    | 48.58    | 49.17    | 48.35    | 49.93    | 49.23    | 49.32    | 49.49    |
| Fs                             | 6.42     | 7.22     | 2.43     | 2.00     | 0.60     | 0.68     | 0.59     | 0.62     | 0.45     | 1.14     | 0.39     |
| Ac                             | 0.23     | 0.42     | 0.13     | 0.45     | 0.26     | 0.22     | 0.27     | 0.13     | 0.30     | 0.14     | 0.50     |
| Di                             | 92.00    | 95.00    | 95.00    | 96.00    | 99.00    | 99.00    | 100.00   | 99.00    | 99.00    | 100.00   | 100.00   |
| Hd                             | 7.00     | 5.00     | 5.00     | 4.00     | 1.00     | 1.00     | 0.00     | 1.00     | 1.00     | 0.00     | 0.00     |
| Jo                             | 1.00     | 0.00     | 0.00     | 0.00     | 0.00     | 0.00     | 0.00     | 0.00     | 0.00     | 0.00     | 0.00     |
| Sample No.                     | JL-cpx23 | JL-cpx24 | JL-cpx25 | JL-cpx26 | JL-cpx27 | JL-cpx28 | JL-cpx29 | JL-cpx30 | JL-cpx31 | JL-cpx32 | JL-cpx33 |
| SiO <sub>2</sub>               | 55.23    | 55.26    | 55.35    | 55.20    | 54.08    | 53.27    | 54.41    | 53.92    | 54.32    | 55.00    | 54.85    |
| TiO <sub>2</sub>               | 0.02     | 0.03     | 0.04     | 0.10     | 0.01     | 0.00     | 0.00     | 0.02     | 0.00     | 0.00     | 0.01     |
| Al <sub>2</sub> O <sub>3</sub> | 1.03     | 1.14     | 0.91     | 1.08     | 0.26     | 0.47     | 0.34     | 0.30     | 0.79     | 0.37     | 0.43     |
| Cr <sub>2</sub> O <sub>3</sub> | 0.00     | 0.01     | 0.01     | 0.15     | 0.01     | 0.01     | 0.00     | 0.00     | 0.01     | 0.04     | 0.04     |
| FeO                            | 0.34     | 0.33     | 0.27     | 0.32     | 1.81     | 4.51     | 2.09     | 1.97     | 3.40     | 1.88     | 2.22     |

|     |       |       |       |       |       |       |       |       |       |       |       |
|-----|-------|-------|-------|-------|-------|-------|-------|-------|-------|-------|-------|
| MnO | 0.00  | 0.00  | 0.00  | 0.00  | 0.08  | 0.18  | 0.06  | 0.03  | 0.11  | 0.11  | 0.06  |
| MgO | 18.16 | 17.94 | 18.01 | 18.45 | 17.37 | 15.29 | 17.25 | 17.35 | 16.16 | 17.72 | 17.05 |
| CaO | 25.93 | 25.66 | 25.79 | 25.36 | 25.51 | 24.59 | 25.19 | 25.33 | 24.79 | 25.66 | 24.90 |

**Table S1. (continued)**

| Sample No.                     | JL-cpx23 | JL-cpx24 | JL-cpx25 | JL-cpx26 | JL-cpx27 | JL-cpx28 | JL-cpx29 | JL-cpx30 | JL-cpx31 | JL-cpx32 | JL-cpx33 |
|--------------------------------|----------|----------|----------|----------|----------|----------|----------|----------|----------|----------|----------|
| Na <sub>2</sub> O              | 0.05     | 0.12     | 0.05     | 0.22     | 0.09     | 0.23     | 0.05     | 0.11     | 0.15     | 0.03     | 0.07     |
| K <sub>2</sub> O               | 0.01     | 0.01     | 0.00     | 0.04     | 0.04     | 0.03     | 0.00     | 0.02     | 0.02     | 0.02     | 0.00     |
| Total                          | 100.77   | 100.50   | 100.43   | 100.92   | 99.26    | 98.58    | 99.39    | 99.05    | 99.75    | 100.83   | 99.63    |
| Si                             | 1.98     | 1.98     | 1.99     | 1.97     | 1.98     | 1.99     | 1.99     | 1.98     | 1.99     | 1.98     | 2.00     |
| Ti                             | 0.00     | 0.00     | 0.00     | 0.00     | 0.00     | 0.00     | 0.00     | 0.00     | 0.00     | 0.00     | 0.00     |
| Al <sup>IV</sup>               | 0.02     | 0.02     | 0.01     | 0.03     | 0.01     | 0.01     | 0.01     | 0.01     | 0.01     | 0.02     | 0.00     |
| Al <sup>VI</sup>               | 0.02     | 0.03     | 0.03     | 0.02     | 0.00     | 0.01     | 0.01     | 0.00     | 0.02     | 0.00     | 0.02     |
| Cr                             | 0.00     | 0.00     | 0.00     | 0.00     | 0.00     | 0.00     | 0.00     | 0.00     | 0.00     | 0.00     | 0.00     |
| Fe <sup>3+</sup>               | 0.00     | 0.00     | 0.00     | 0.02     | 0.04     | 0.03     | 0.01     | 0.04     | 0.00     | 0.03     | 0.00     |
| Fe <sup>2+</sup>               | 0.01     | 0.01     | 0.01     | 0.00     | 0.01     | 0.11     | 0.05     | 0.02     | 0.10     | 0.03     | 0.07     |
| Mn                             | 0.00     | 0.00     | 0.00     | 0.00     | 0.00     | 0.01     | 0.00     | 0.00     | 0.00     | 0.00     | 0.00     |
| Mg                             | 0.97     | 0.96     | 0.96     | 0.98     | 0.95     | 0.85     | 0.94     | 0.95     | 0.88     | 0.95     | 0.93     |
| Ca                             | 1.00     | 0.99     | 0.99     | 0.97     | 1.00     | 0.98     | 0.99     | 1.00     | 0.97     | 0.99     | 0.97     |
| Na                             | 0.00     | 0.01     | 0.00     | 0.02     | 0.01     | 0.02     | 0.00     | 0.01     | 0.01     | 0.00     | 0.01     |
| K                              | 0.00     | 0.00     | 0.00     | 0.00     | 0.00     | 0.00     | 0.00     | 0.00     | 0.00     | 0.00     | 0.00     |
| Total                          | 4.00     | 4.00     | 3.99     | 4.01     | 4.00     | 4.01     | 4.00     | 4.01     | 3.98     | 4.00     | 4.00     |
| Wo                             | 50.30    | 50.22    | 50.43    | 49.07    | 49.71    | 49.25    | 49.43    | 49.45    | 49.31    | 49.42    | 49.28    |
| En                             | 49.01    | 48.86    | 48.99    | 49.66    | 47.10    | 42.62    | 47.10    | 47.12    | 44.71    | 47.50    | 46.94    |
| Fs                             | 0.51     | 0.50     | 0.41     | 0.49     | 2.87     | 7.31     | 3.28     | 3.04     | 5.45     | 2.98     | 3.52     |
| Ac                             | 0.18     | 0.42     | 0.17     | 0.78     | 0.32     | 0.82     | 0.19     | 0.39     | 0.53     | 0.10     | 0.26     |
| Di                             | 99.00    | 99.00    | 99.00    | 100.00   | 98.00    | 88.00    | 94.00    | 98.00    | 89.00    | 97.00    | 93.00    |
| Hd                             | 1.00     | 1.00     | 1.00     | 0.00     | 1.00     | 12.00    | 5.00     | 2.00     | 11.00    | 3.00     | 7.00     |
| Jo                             | 0.00     | 0.00     | 0.00     | 0.00     | 0.00     | 1.00     | 0.00     | 0.00     | 0.00     | 0.00     | 0.00     |
| Sample No.                     | JL-cpx34 | JL-cpx35 | JL-cpx36 | JL-cpx37 | JL-cpx38 | JL-cpx39 | JL-cpx40 | JL-cpx41 | JL-cpx42 | JL-cpx43 | JL-cpx44 |
| SiO <sub>2</sub>               | 54.98    | 54.60    | 52.48    | 51.74    | 48.44    | 51.50    | 52.05    | 52.53    | 51.53    | 53.63    | 53.55    |
| TiO <sub>2</sub>               | 0.00     | 0.00     | 0.19     | 0.02     | 0.08     | 0.12     | 0.08     | 0.00     | 0.06     | 0.04     | 0.09     |
| Al <sub>2</sub> O <sub>3</sub> | 0.44     | 0.62     | 2.20     | 1.58     | 5.45     | 2.28     | 1.65     | 0.45     | 2.45     | 0.64     | 0.87     |
| Cr <sub>2</sub> O <sub>3</sub> | 0.00     | 0.00     | 0.02     | 0.00     | 0.00     | 0.08     | 0.05     | 0.00     | 0.00     | 0.05     | 0.00     |
| FeO                            | 3.46     | 2.78     | 6.75     | 6.98     | 10.23    | 6.50     | 6.43     | 7.95     | 7.53     | 6.92     | 6.10     |
| MnO                            | 0.07     | 0.05     | 0.15     | 0.25     | 0.17     | 0.25     | 0.18     | 0.40     | 0.29     | 0.19     | 0.15     |
| MgO                            | 16.44    | 16.64    | 13.59    | 13.58    | 10.19    | 13.65    | 13.95    | 12.65    | 13.09    | 13.79    | 14.48    |

|                   |       |       |       |       |       |       |       |       |       |       |       |
|-------------------|-------|-------|-------|-------|-------|-------|-------|-------|-------|-------|-------|
| CaO               | 24.54 | 25.05 | 24.00 | 24.30 | 23.04 | 24.22 | 24.56 | 24.44 | 24.49 | 23.99 | 24.44 |
| Na <sub>2</sub> O | 0.24  | 0.12  | 0.45  | 0.25  | 0.64  | 0.31  | 0.29  | 0.15  | 0.30  | 0.30  | 0.30  |
| K <sub>2</sub> O  | 0.02  | 0.01  | 0.00  | 0.01  | 0.00  | 0.00  | 0.00  | 0.00  | 0.02  | 0.03  | 0.01  |

**Table S1. (continued)**

| Sample No.                     | JL-cpx34 | JL-cpx35 | JL-cpx36 | JL-cpx37 | JL-cpx38 | JL-cpx39 | JL-cpx40 | JL-cpx41 | JL-cpx42 | JL-cpx43 | JL-cpx44 |
|--------------------------------|----------|----------|----------|----------|----------|----------|----------|----------|----------|----------|----------|
| Total                          | 100.19   | 99.87    | 99.83    | 98.71    | 98.24    | 98.91    | 99.24    | 98.57    | 99.76    | 99.58    | 99.99    |
| Si                             | 2.00     | 1.99     | 1.95     | 1.95     | 1.87     | 1.94     | 1.95     | 1.99     | 1.93     | 2.00     | 1.98     |
| Ti                             | 0.00     | 0.00     | 0.01     | 0.00     | 0.00     | 0.00     | 0.00     | 0.00     | 0.00     | 0.00     | 0.00     |
| Al <sup>IV</sup>               | 0.00     | 0.01     | 0.05     | 0.05     | 0.13     | 0.06     | 0.05     | 0.01     | 0.07     | 0.00     | 0.02     |
| Al <sup>VI</sup>               | 0.02     | 0.02     | 0.05     | 0.02     | 0.11     | 0.04     | 0.02     | 0.01     | 0.04     | 0.03     | 0.02     |
| Cr                             | 0.00     | 0.00     | 0.00     | 0.00     | 0.00     | 0.00     | 0.00     | 0.00     | 0.00     | 0.00     | 0.00     |
| Fe <sup>3+</sup>               | 0.00     | 0.00     | 0.03     | 0.06     | 0.10     | 0.06     | 0.06     | 0.00     | 0.07     | 0.00     | 0.02     |
| Fe <sup>2+</sup>               | 0.11     | 0.08     | 0.18     | 0.16     | 0.23     | 0.14     | 0.14     | 0.25     | 0.16     | 0.22     | 0.17     |
| Mn                             | 0.00     | 0.00     | 0.00     | 0.01     | 0.01     | 0.01     | 0.01     | 0.01     | 0.01     | 0.01     | 0.00     |
| Mg                             | 0.89     | 0.91     | 0.75     | 0.76     | 0.59     | 0.77     | 0.78     | 0.72     | 0.73     | 0.77     | 0.80     |
| Ca                             | 0.96     | 0.98     | 0.96     | 0.98     | 0.95     | 0.98     | 0.99     | 0.99     | 0.98     | 0.96     | 0.97     |
| Na                             | 0.02     | 0.01     | 0.03     | 0.02     | 0.05     | 0.02     | 0.02     | 0.01     | 0.02     | 0.02     | 0.02     |
| K                              | 0.00     | 0.00     | 0.00     | 0.00     | 0.00     | 0.00     | 0.00     | 0.00     | 0.00     | 0.00     | 0.00     |
| Total                          | 4.00     | 4.00     | 4.01     | 4.02     | 4.04     | 4.02     | 4.02     | 3.99     | 4.01     | 4.01     | 4.00     |
| Wo                             | 48.49    | 49.48    | 48.89    | 49.32    | 49.63    | 49.40    | 49.49    | 50.05    | 49.65    | 48.67    | 48.88    |
| En                             | 45.20    | 45.73    | 38.53    | 38.35    | 30.54    | 38.75    | 39.12    | 36.05    | 36.93    | 38.94    | 40.31    |
| Fs                             | 5.44     | 4.37     | 10.94    | 11.40    | 17.34    | 10.69    | 10.34    | 13.35    | 12.31    | 11.28    | 9.74     |
| Ac                             | 0.87     | 0.41     | 1.64     | 0.93     | 2.49     | 1.16     | 1.05     | 0.54     | 1.11     | 1.11     | 1.07     |
| Di                             | 89.00    | 91.00    | 81.00    | 82.00    | 71.00    | 83.00    | 84.00    | 73.00    | 81.00    | 78.00    | 82.00    |
| Hd                             | 11.00    | 9.00     | 19.00    | 17.00    | 28.00    | 16.00    | 15.00    | 26.00    | 18.00    | 22.00    | 17.00    |
| Jo                             | 0.00     | 0.00     | 1.00     | 1.00     | 1.00     | 1.00     | 1.00     | 1.00     | 1.00     | 1.00     | 0.00     |
| Sample No.                     | JL-cpx45 | JL-cpx47 | JL-cpx48 | JL-cpx49 | JL-cpx50 | JL-cpx51 | JL-cpx52 | JL-cpx53 | JL-cpx54 | --       |          |
| SiO <sub>2</sub>               | 54.00    | 53.75    | 53.30    | 54.37    | 53.88    | 54.06    | 53.68    | 53.13    | 53.46    | --       |          |
| TiO <sub>2</sub>               | 0.16     | 0.17     | 0.16     | 0.14     | 0.18     | 0.17     | 0.16     | 0.16     | 0.11     | --       |          |
| Al <sub>2</sub> O <sub>3</sub> | 0.59     | 0.80     | 0.78     | 0.58     | 0.73     | 0.83     | 0.57     | 0.52     | 0.67     | --       |          |
| Cr <sub>2</sub> O <sub>3</sub> | 0.00     | 0.00     | 0.02     | 0.03     | 0.11     | 0.01     | 0.02     | 0.07     | 0.00     | --       |          |
| FeO                            | 8.74     | 7.26     | 7.61     | 8.12     | 8.54     | 7.19     | 8.36     | 7.92     | 8.99     | --       |          |
| MnO                            | 0.23     | 0.26     | 0.24     | 0.21     | 0.20     | 0.18     | 0.25     | 0.20     | 0.30     | --       |          |
| MgO                            | 13.11    | 14.15    | 13.96    | 13.73    | 13.32    | 13.76    | 13.55    | 13.61    | 13.07    | --       |          |
| CaO                            | 22.78    | 23.27    | 23.22    | 23.60    | 23.35    | 23.62    | 23.01    | 23.26    | 22.65    | --       |          |
| Na <sub>2</sub> O              | 0.53     | 0.81     | 0.68     | 0.54     | 0.62     | 0.56     | 0.64     | 0.76     | 0.86     | --       |          |
| K <sub>2</sub> O               | 0.01     | 0.10     | 0.01     | 0.02     | 0.00     | 0.00     | 0.00     | 0.12     | 0.03     | --       |          |
