# Supplementary material
Source: MDPI journal article supplement (https://www.mdpi.com/2075-163X/12/9/1152)
Supplement: s1 [file s1]

**Supplementary Table S2.** EPMA data for magnetites from Jinling diorites, skarn and ore.

| Sample No.                     | JL-<br>mag 1       | JL-<br>mag 2 | JL-<br>mag 3 | JL-<br>mag 4           | JL-<br>mag 5 | JL-<br>mag 6 | JL-<br>mag 7 | JL-<br>mag 8 | JL-<br>mag 9 | JL-<br>mag 10 |
|--------------------------------|--------------------|--------------|--------------|------------------------|--------------|--------------|--------------|--------------|--------------|---------------|
| Genetic type                   | Magmatic magnetite |              |              | Disseminated magnetite |              |              |              |              |              |               |
| SiO <sub>2</sub>               | 0.05               | 0.05         | 0.03         | 2.56                   | 0.09         | 0.03         | 0.37         | 0.35         | 2.57         | 0.12          |
| TiO <sub>2</sub>               | 0.27               | 0.06         | 0.19         | 0.18                   | 0.05         | 0.00         | 0.05         | 0.03         | 0.07         | 0.08          |
| Al <sub>2</sub> O <sub>3</sub> | 0.30               | 0.04         | 0.06         | 0.86                   | 0.31         | 0.35         | 0.42         | 0.32         | 1.33         | 0.34          |
| Cr <sub>2</sub> O <sub>3</sub> | 0.79               | 0.75         | 0.88         | 0.00                   | 0.00         | 0.01         | 0.01         | 0.03         | 0.07         | 0.03          |
| V <sub>2</sub> O <sub>3</sub>  | 0.36               | 1.03         | 0.93         | 0.02                   | 0.04         | 0.02         | 0.05         | 0.07         | 0.06         | 0.04          |
| FeO                            | 89.89              | 90.84        | 90.54        | 86.40                  | 91.12        | 91.59        | 91.46        | 92.10        | 86.50        | 91.97         |
| MnO                            | 0.00               | 0.03         | 0.00         | 0.10                   | 0.01         | 0.01         | 0.05         | 0.03         | 0.00         | 0.01          |
| MgO                            | 0.03               | 0.00         | 0.03         | 1.03                   | 0.02         | 0.00         | 0.11         | 0.11         | 0.79         | 0.04          |

**Table S2. (continued)**

| Sample No.       | JL-<br>mag 1       | JL-<br>mag 2 | JL-<br>mag 3 | JL-<br>mag 4           | JL-<br>mag 5 | JL-<br>mag 6 | JL-<br>mag 7 | JL-<br>mag 8 | JL-<br>mag 9 | JL-<br>mag 10 |
|------------------|--------------------|--------------|--------------|------------------------|--------------|--------------|--------------|--------------|--------------|---------------|
| Genetic type     | Magmatic magnetite |              |              | Disseminated magnetite |              |              |              |              |              |               |
| CaO              | 0.00               | 0.02         | 0.07         | 1.19                   | 0.00         | 0.00         | 0.14         | 0.10         | 1.21         | 0.00          |
| Total            | 91.69              | 92.82        | 92.73        | 92.34                  | 91.64        | 92.01        | 92.66        | 93.14        | 92.60        | 92.63         |
| Si               | 0.01               | 0.01         | 0.01         | 0.78                   | 0.03         | 0.01         | 0.11         | 0.11         | 0.78         | 0.04          |
| Ti               | 0.06               | 0.01         | 0.04         | 0.04                   | 0.01         | 0.00         | 0.01         | 0.01         | 0.02         | 0.02          |
| Al               | 0.11               | 0.01         | 0.02         | 0.31                   | 0.11         | 0.13         | 0.15         | 0.12         | 0.48         | 0.12          |
| Cr               | 0.19               | 0.18         | 0.22         | 0.00                   | 0.00         | 0.00         | 0.00         | 0.01         | 0.02         | 0.01          |
| V                | 0.09               | 0.26         | 0.23         | 0.00                   | 0.01         | 0.00         | 0.01         | 0.02         | 0.01         | 0.01          |
| Fe <sup>3+</sup> | 15.45              | 15.49        | 15.42        | 14.05                  | 15.79        | 15.85        | 15.58        | 15.63        | 13.90        | 15.75         |
| Fe <sup>2+</sup> | 8.06               | 8.01         | 8.02         | 7.94                   | 8.03         | 8.01         | 8.02         | 8.02         | 8.05         | 8.04          |
| Mn               | 0.00               | 0.01         | 0.00         | 0.03                   | 0.00         | 0.00         | 0.01         | 0.01         | 0.00         | 0.00          |
| Mg               | 0.01               | 0.00         | 0.02         | 0.47                   | 0.01         | 0.00         | 0.05         | 0.05         | 0.36         | 0.02          |
| Ca               | 0.00               | 0.00         | 0.02         | 0.39                   | 0.00         | 0.00         | 0.05         | 0.03         | 0.39         | 0.00          |
| Total            | 24.00              | 24.00        | 24.00        | 24.00                  | 24.00        | 24.00        | 24.00        | 24.00        | 24.00        | 24.00         |
| V/Ti             | 0.00               | 0.00         | 0.02         | 0.29                   | 1.02         | --           | 1.28         | 14.46        | 14.27        | 15.36         |

| Sample No.                     | JL-<br>mag 11    | JL-<br>mag 12 | JL-<br>mag 13 | JL-<br>mag 14 | JL-<br>mag 15 | JL-<br>mag 16 | JL-<br>mag 17 | JL-<br>mag 18 | JL-<br>mag 19     | JL-<br>mag 20 |
|--------------------------------|------------------|---------------|---------------|---------------|---------------|---------------|---------------|---------------|-------------------|---------------|
| Genetic type                   | Banded magnetite |               |               |               |               |               |               |               | Massive magnetite |               |
| SiO <sub>2</sub>               | 0.06             | 0.04          | 0.03          | 0.04          | 0.07          | 0.08          | 0.13          | 0.16          | 0.28              | 0.34          |
| TiO <sub>2</sub>               | 0.70             | 0.87          | 0.25          | 0.70          | 0.41          | 0.62          | 0.69          | 0.63          | 0.01              | 0.11          |
| Al <sub>2</sub> O <sub>3</sub> | 0.76             | 1.25          | 0.14          | 0.81          | 0.51          | 0.52          | 0.96          | 0.65          | 0.11              | 0.22          |
| Cr <sub>2</sub> O <sub>3</sub> | 0.00             | 0.06          | 0.00          | 0.00          | 0.12          | 0.02          | 0.00          | 0.00          | 0.03              | 0.03          |
| V <sub>2</sub> O <sub>3</sub>  | 0.00             | 0.00          | 0.02          | 0.00          | 0.06          | 0.04          | 0.00          | 0.07          | 0.02              | 0.02          |
| FeO                            | 84.91            | 83.68         | 86.30         | 84.51         | 88.59         | 86.45         | 83.43         | 88.12         | 92.77             | 94.33         |
| MnO                            | 0.17             | 0.15          | 0.36          | 0.26          | 0.26          | 0.19          | 0.14          | 0.29          | 0.05              | 0.01          |
| MgO                            | 7.33             | 7.54          | 4.80          | 7.86          | 3.54          | 4.39          | 7.81          | 4.34          | 0.06              | 0.13          |
| CaO                            | 0.00             | 0.00          | 0.00          | 0.00          | 0.00          | 0.00          | 0.00          | 0.00          | 0.10              | 0.10          |
| Total                          | 93.93            | 93.59         | 91.90         | 94.18         | 93.56         | 92.31         | 93.16         | 94.26         | 93.43             | 95.29         |

|                  |       |       |       |       |       |       |       |       |       |       |
|------------------|-------|-------|-------|-------|-------|-------|-------|-------|-------|-------|
| Si               | 0.02  | 0.01  | 0.01  | 0.01  | 0.02  | 0.02  | 0.04  | 0.05  | 0.09  | 0.10  |
| Ti               | 0.15  | 0.19  | 0.06  | 0.15  | 0.09  | 0.14  | 0.15  | 0.14  | 0.00  | 0.02  |
| Al               | 0.26  | 0.42  | 0.05  | 0.27  | 0.18  | 0.18  | 0.33  | 0.22  | 0.04  | 0.08  |
| Cr               | 0.00  | 0.01  | 0.00  | 0.00  | 0.03  | 0.00  | 0.00  | 0.00  | 0.01  | 0.01  |
| V                | 0.00  | 0.00  | 0.00  | 0.00  | 0.02  | 0.01  | 0.00  | 0.02  | 0.00  | 0.00  |
| Fe <sup>3+</sup> | 15.40 | 15.17 | 15.82 | 15.40 | 15.55 | 15.47 | 15.30 | 15.39 | 15.78 | 15.66 |
| Fe <sup>2+</sup> | 4.99  | 4.93  | 5.83  | 4.76  | 6.48  | 6.16  | 4.80  | 6.21  | 8.01  | 8.03  |
| Mn               | 0.04  | 0.04  | 0.09  | 0.06  | 0.06  | 0.05  | 0.03  | 0.07  | 0.01  | 0.00  |
| Mg               | 3.14  | 3.23  | 2.15  | 3.34  | 1.57  | 1.96  | 3.35  | 1.90  | 0.03  | 0.06  |
| Ca               | 0.00  | 0.00  | 0.00  | 0.00  | 0.00  | 0.00  | 0.00  | 0.00  | 0.03  | 0.03  |
| Total            | 24.00 | 24.00 | 24.00 | 24.00 | 24.00 | 24.00 | 24.00 | 24.00 | 24.00 | 24.00 |
| V/Ti             | 0.00  | 0.00  | 0.08  | 0.00  | 0.17  | 0.08  | 0.00  | 0.12  | 3.21  | 0.18  |

**Table S2. (continued)**

| Sample No.                     | JL-<br>mag 21     | JL-<br>mag 22 | JL-<br>mag 23 | JL-<br>mag 24 | JL-<br>mag 25 | JL-<br>mag 26 | JL-<br>mag 27 | JL-<br>mag 28 | JL-<br>mag 29 | JL-<br>mag 30 |
|--------------------------------|-------------------|---------------|---------------|---------------|---------------|---------------|---------------|---------------|---------------|---------------|
| Genetic type                   | Massive magnetite |               |               |               |               |               |               |               |               |               |
| SiO <sub>2</sub>               | 0.10              | 0.16          | 0.61          | 0.04          | 0.17          | 0.41          | 0.21          | 0.07          | 0.07          | 0.06          |
| TiO <sub>2</sub>               | 0.01              | 0.00          | 0.03          | 0.06          | 0.00          | 0.03          | 0.07          | 0.02          | 0.04          | 0.00          |
| Al <sub>2</sub> O <sub>3</sub> | 0.33              | 0.32          | 0.14          | 0.03          | 0.08          | 0.17          | 0.10          | 0.00          | 0.10          | 0.06          |
| Cr <sub>2</sub> O <sub>3</sub> | 0.06              | 0.01          | 0.01          | 0.00          | 0.00          | 0.01          | 1.57          | 0.03          | 0.05          | 0.00          |
| V <sub>2</sub> O <sub>3</sub>  | 0.02              | 0.02          | 0.02          | 0.06          | 0.05          | 0.05          | 0.02          | 0.00          | 0.01          | 0.05          |
| FeO                            | 94.02             | 93.21         | 89.52         | 94.57         | 94.04         | 94.18         | 89.44         | 94.18         | 93.47         | 94.03         |
| MnO                            | 0.09              | 0.10          | 0.04          | 0.09          | 0.04          | 0.03          | 0.02          | 0.02          | 0.10          | 0.14          |
| MgO                            | 0.04              | 0.04          | 0.04          | 0.01          | 0.02          | 0.11          | 0.04          | 0.02          | 0.05          | 0.03          |
| CaO                            | 0.00              | 0.04          | 0.32          | 0.00          | 0.00          | 0.08          | 0.00          | 0.00          | 0.00          | 0.00          |
| Total                          | 94.67             | 93.90         | 90.73         | 94.86         | 94.40         | 95.07         | 91.47         | 94.34         | 93.89         | 94.37         |
| Si                             | 0.03              | 0.05          | 0.19          | 0.01          | 0.05          | 0.12          | 0.07          | 0.02          | 0.02          | 0.02          |
| Ti                             | 0.00              | 0.00          | 0.01          | 0.01          | 0.00          | 0.01          | 0.02          | 0.01          | 0.01          | 0.00          |
| Al                             | 0.12              | 0.12          | 0.05          | 0.01          | 0.03          | 0.06          | 0.04          | 0.00          | 0.03          | 0.02          |
| Cr                             | 0.02              | 0.00          | 0.00          | 0.00          | 0.00          | 0.00          | 0.39          | 0.01          | 0.01          | 0.00          |
| V                              | 0.01              | 0.00          | 0.00          | 0.01          | 0.01          | 0.01          | 0.01          | 0.00          | 0.00          | 0.01          |
| Fe <sup>3+</sup>               | 15.80             | 15.78         | 15.54         | 15.92         | 15.86         | 15.67         | 15.40         | 15.94         | 15.89         | 15.93         |
| Fe <sup>2+</sup>               | 7.99              | 8.00          | 8.06          | 8.00          | 8.03          | 8.05          | 8.06          | 8.01          | 7.98          | 7.97          |
| Mn                             | 0.02              | 0.02          | 0.01          | 0.02          | 0.01          | 0.01          | 0.01          | 0.00          | 0.02          | 0.04          |
| Mg                             | 0.02              | 0.02          | 0.02          | 0.01          | 0.01          | 0.05          | 0.02          | 0.01          | 0.02          | 0.01          |
| Ca                             | 0.00              | 0.01          | 0.11          | 0.00          | 0.00          | 0.02          | 0.00          | 0.00          | 0.00          | 0.00          |
| Total                          | 24.00             | 24.00         | 24.00         | 24.00         | 24.00         | 24.00         | 24.00         | 24.00         | 24.00         | 24.00         |
| V/Ti                           | 3.02              | --            | 0.60          | 1.01          | --            | 1.75          | 0.35          | 0.09          | 0.25          | --            |
| Sample No.                     | JL-<br>mag 31     | JL-<br>mag 32 | JL-<br>mag 33 | JL-<br>mag 34 | JL-<br>mag 35 | JL-<br>mag 36 | JL-<br>mag 37 | JL-<br>mag 38 | JL-<br>mag 39 | JL-<br>mag 40 |
| Genetic type                   | Massive magnetite |               |               |               |               |               |               |               |               |               |
| SiO <sub>2</sub>               | 0.71              | 0.03          | 0.23          | 0.49          | 0.81          | 0.34          | 0.89          | 0.57          | 1.10          | 0.17          |
| TiO <sub>2</sub>               | 0.06              | 0.00          | 0.00          | 0.02          | 0.00          | 0.01          | 0.02          | 0.04          | 0.05          | 0.01          |

|                                |       |       |       |       |       |       |       |       |       |       |
|--------------------------------|-------|-------|-------|-------|-------|-------|-------|-------|-------|-------|
| Al <sub>2</sub> O <sub>3</sub> | 0.19  | 0.04  | 0.30  | 0.39  | 0.45  | 0.25  | 0.44  | 0.44  | 0.17  | 0.04  |
| Cr <sub>2</sub> O <sub>3</sub> | 0.00  | 0.05  | 0.03  | 0.03  | 0.01  | 0.03  | 0.00  | 0.00  | 0.06  | 0.05  |
| V <sub>2</sub> O <sub>3</sub>  | 0.03  | 0.07  | 0.02  | 0.00  | 0.00  | 0.01  | 0.01  | 0.01  | 0.00  | 0.00  |
| FeO                            | 93.28 | 94.20 | 93.17 | 91.90 | 91.18 | 92.29 | 92.58 | 92.23 | 87.81 | 89.90 |
| MnO                            | 0.06  | 0.08  | 0.00  | 0.02  | 0.04  | 0.06  | 0.07  | 0.00  | 0.00  | 0.00  |
| MgO                            | 0.28  | 0.03  | 0.07  | 0.09  | 0.15  | 0.01  | 0.23  | 0.23  | 0.14  | 0.13  |
| CaO                            | 0.17  | 0.01  | 0.00  | 0.03  | 0.12  | 0.00  | 0.06  | 0.02  | 0.04  | 0.03  |
| Total                          | 94.78 | 94.51 | 93.82 | 92.97 | 92.96 | 93.00 | 94.30 | 93.54 | 89.37 | 90.33 |
| Si                             | 0.22  | 0.01  | 0.07  | 0.15  | 0.25  | 0.10  | 0.27  | 0.17  | 0.35  | 0.06  |
| Ti                             | 0.01  | 0.00  | 0.00  | 0.00  | 0.00  | 0.00  | 0.00  | 0.01  | 0.01  | 0.00  |
| Al                             | 0.07  | 0.02  | 0.11  | 0.14  | 0.16  | 0.09  | 0.16  | 0.16  | 0.06  | 0.01  |

**Table S2 (continued)**

| Sample No.       | JL-<br>mag 31     | JL-<br>mag 32 | JL-<br>mag t33 | JL-<br>mag 34 | JL-<br>mag 35 | JL-<br>mag 36 | JL-<br>mag 37 | JL-<br>mag 38 | JL-<br>mag 39 | JL-<br>mag 40 |
|------------------|-------------------|---------------|----------------|---------------|---------------|---------------|---------------|---------------|---------------|---------------|
| Genetic type     | Massive magnetite |               |                |               |               |               |               |               |               |               |
| Cr               | 0.00              | 0.01          | 0.01           | 0.01          | 0.00          | 0.01          | 0.00          | 0.00          | 0.01          | 0.01          |
| V                | 0.01              | 0.02          | 0.00           | 0.00          | 0.00          | 0.00          | 0.00          | 0.00          | 0.00          | 0.00          |
| Fe <sup>3+</sup> | 15.47             | 15.94         | 15.74          | 15.54         | 15.34         | 15.69         | 15.29         | 15.47         | 15.20         | 15.86         |
| Fe <sup>2+</sup> | 8.04              | 7.97          | 8.04           | 8.10          | 8.13          | 8.08          | 8.14          | 8.07          | 8.29          | 7.99          |
| Mn               | 0.01              | 0.02          | 0.00           | 0.00          | 0.01          | 0.02          | 0.02          | 0.00          | 0.00          | 0.00          |
| Mg               | 0.12              | 0.02          | 0.03           | 0.04          | 0.07          | 0.01          | 0.10          | 0.10          | 0.06          | 0.06          |
| Ca               | 0.06              | 0.00          | 0.00           | 0.01          | 0.04          | 0.00          | 0.02          | 0.01          | 0.01          | 0.01          |
| Total            | 24.00             | 24.00         | 24.00          | 24.00         | 24.00         | 24.00         | 24.00         | 24.00         | 24.00         | 24.00         |
| V/Ti             | 0.58              | --            | --             | 0.00          | --            | 0.00          | 0.00          | 0.00          | 0.20          | 2.11          |

  

| Sample No.                     | JL-<br>mag 41     | JL-<br>mag 43 | JL-<br>mag 44 | JL-<br>mag 45 | JL-<br>mag 46 | JL-<br>mag 47 | JL-<br>mag 48 | JL-<br>mag 49 | JL-<br>mag 50 | JL-<br>mag 51 |
|--------------------------------|-------------------|---------------|---------------|---------------|---------------|---------------|---------------|---------------|---------------|---------------|
| Genetic type                   | Massive magnetite |               |               |               |               |               |               |               |               |               |
| SiO <sub>2</sub>               | 0.10              | 0.18          | 0.18          | 0.30          | 0.30          | 0.10          | 0.18          | 0.30          | 0.18          | 0.13          |
| TiO <sub>2</sub>               | 0.07              | 0.02          | 0.01          | 0.14          | 0.09          | 0.07          | 0.05          | 0.01          | 0.00          | 0.08          |
| Al <sub>2</sub> O <sub>3</sub> | 0.01              | 0.07          | 0.04          | 0.12          | 0.27          | 0.24          | 0.08          | 0.39          | 0.05          | 0.05          |
| Cr <sub>2</sub> O <sub>3</sub> | 0.00              | 0.22          | 0.00          | 0.02          | 0.00          | 0.01          | 0.00          | 0.00          | 0.01          | 0.01          |
| V <sub>2</sub> O <sub>3</sub>  | 0.00              | 0.00          | 0.02          | 0.00          | 0.06          | 0.02          | 0.00          | 0.00          | 0.02          | 0.00          |
| FeO                            | 91.93             | 90.45         | 91.09         | 91.40         | 90.59         | 91.08         | 91.78         | 89.25         | 90.67         | 91.08         |
| MnO                            | 0.07              | 0.00          | 0.07          | 0.14          | 0.03          | 0.05          | 0.08          | 0.16          | 0.03          | 0.00          |
| MgO                            | 0.20              | 0.07          | 0.13          | 0.16          | 0.32          | 0.52          | 0.37          | 0.60          | 0.38          | 0.06          |
| CaO                            | 0.00              | 0.00          | 0.00          | 0.00          | 0.02          | 0.00          | 0.00          | 0.00          | 0.00          | 0.00          |
| Total                          | 92.38             | 91.01         | 91.54         | 92.28         | 91.68         | 92.09         | 92.54         | 90.71         | 91.34         | 91.41         |
| Si                             | 0.03              | 0.06          | 0.05          | 0.09          | 0.09          | 0.03          | 0.06          | 0.09          | 0.06          | 0.04          |
| Ti                             | 0.02              | 0.00          | 0.00          | 0.03          | 0.02          | 0.02          | 0.01          | 0.00          | 0.00          | 0.02          |
| Al                             | 0.00              | 0.03          | 0.01          | 0.04          | 0.10          | 0.09          | 0.03          | 0.14          | 0.02          | 0.02          |
| Cr                             | 0.00              | 0.06          | 0.00          | 0.00          | 0.00          | 0.00          | 0.00          | 0.00          | 0.00          | 0.00          |
| V                              | 0.00              | 0.00          | 0.01          | 0.00          | 0.01          | 0.00          | 0.00          | 0.00          | 0.01          | 0.00          |
| Fe <sup>3+</sup>               | 15.90             | 15.80         | 15.87         | 15.71         | 15.66         | 15.81         | 15.84         | 15.67         | 15.86         | 15.86         |

|                  |       |       |       |       |       |       |       |       |       |       |
|------------------|-------|-------|-------|-------|-------|-------|-------|-------|-------|-------|
| Fe <sup>2+</sup> | 7.94  | 8.03  | 7.98  | 8.02  | 7.95  | 7.79  | 7.87  | 7.77  | 7.87  | 8.03  |
| Mn               | 0.02  | 0.00  | 0.02  | 0.04  | 0.01  | 0.01  | 0.02  | 0.04  | 0.01  | 0.00  |
| Mg               | 0.09  | 0.03  | 0.06  | 0.07  | 0.15  | 0.24  | 0.17  | 0.28  | 0.18  | 0.03  |
| Ca               | 0.00  | 0.00  | 0.00  | 0.00  | 0.01  | 0.00  | 0.00  | 0.00  | 0.00  | 0.00  |
| Total            | 24.00 | 24.00 | 24.00 | 24.00 | 24.00 | 24.00 | 24.00 | 24.00 | 24.00 | 24.00 |
| V/Ti             | 0.20  | 0.90  | 1.86  | 0.15  | 0.25  | 0.30  | 0.53  | 2.65  | --    | 0.60  |

---
